# Supplementary material for: General Anesthesia versus Conscious Sedation in Mechanical Thrombectomy
Source: PubMed Central journal article supplement — J Stroke. 2021 Jan 31;23(1):103–12. doi: 10.5853/jos.2020.02404 (PMC7900389; doi:10.5853/jos.2020.02404), 2021-01-31
Supplement: jos-2020-02404-suppl1.pdf [file jos-2020-02404-suppl1.pdf]

**Supplementary Table 1.** Characteristics of GSR patients with anterior circulation stroke comparing the anesthesia regimen (n=5,808 patients, unknown in n=256)

| Characteristic                                        | Conscious sedation<br>(n=1,572, 27.1%) | General anesthesia<br>(n=3,786, 65.2%) | Conversion<br>(n=194, 3.3%)  | P      |
|-------------------------------------------------------|----------------------------------------|----------------------------------------|------------------------------|--------|
| Age (yr)                                              | 73.4±13.0                              | 73.4±13.0                              | 72.0±12.8                    | 0.168  |
| Female sex                                            | 799 (50.8)                             | 1,984 (52.4)                           | 98 (50.5)                    | 0.516  |
| <b>Clinical characteristics at admission</b>          |                                        |                                        |                              |        |
| pmRS                                                  | 0 (0–1)<br>(missing in n=42)           | 0 (0–1)<br>(missing in n=281)          | 0 (0–1)<br>(missing in n=13) | 0.014  |
| pmRS ≤1                                               | 1,222 (77.7)                           | 2,737 (72.3)                           | 150 (77.3)                   | 0.002  |
| Baseline NIHSS                                        | 14 (9–17)                              | 15 (10–19)                             | 15 (10–19)                   | <0.001 |
| Drip and ship                                         | 773 (49.2)                             | 1,564 (41.3)                           | 94 (48.5)                    | <0.001 |
| Admission BP systolic                                 | 154.4±27.5                             | 151.1±27.2                             | 154.1±27.6                   | <0.001 |
| Admission BP diastolic                                | 84.1±16.9                              | 82.2±16.8                              | 85.6±15.9                    | <0.001 |
| Admission heartrate                                   | 81.9±18.2                              | 81.9±19.4                              | 84.3±18.7                    | 0.111  |
| OAC at admission                                      | 315 (20.0)                             | 787 (20.8)                             | 32 (16.5)                    | 0.067  |
| <b>Risk factors</b>                                   |                                        |                                        |                              |        |
| Arterial hypertension                                 | 1,165 (74.1)                           | 2,774 (73.3)                           | 139 (71.6)                   | 0.004  |
| Diabetes mellitus                                     | 326 (20.7)                             | 792 (20.9)                             | 42 (21.6)                    | 0.459  |
| Hypercholesterolemia                                  | 512 (32.6)                             | 1,509 (39.9)                           | 69 (35.6)                    | <0.001 |
| Current smoking                                       | 197 (12.5)                             | 513 (13.5)                             | 35 (18.0)                    | <0.001 |
| Atrial fibrillation                                   | 637 (40.5)                             | 1,550 (40.9)                           | 74 (38.1)                    | 0.082  |
| <b>Imaging data</b>                                   |                                        |                                        |                              |        |
| ASPECTS                                               | 9 (7–10)                               | 9 (7–10)                               | 8 (7–10)                     | 0.010  |
| Tandem lesion                                         | 216 (13.7)                             | 598 (15.8)                             | 37 (19.1)                    | 0.020  |
| Right-sided occlusion                                 | 791 (50.3)                             | 1,728 (45.7)                           | 85 (43.8)                    | 0.001  |
| <b>Time intervals (min)</b>                           |                                        |                                        |                              |        |
| Admission to groin                                    | 60.0 (39.0–88.0)                       | 70.0 (47.0–100.0)                      | 60.0 (41.0–81.0)             | <0.001 |
| Groin to flow restoration                             | 39.0 (25.0–63.0)                       | 41.0 (26.0–65.0)                       | 64.0 (42.0–100.0)            | <0.001 |
| Admission to flow restoration                         | 106.0 (75.0–142.0)                     | 118.0 (88.0–159.0)                     | 129.0 (97.0–179.0)           | <0.001 |
| <b>Treatment</b>                                      |                                        |                                        |                              |        |
| IVT treatment                                         | 809 (51.5)                             | 1,910 (50.4)                           | 121 (62.4)                   | 0.005  |
| Additive medication during thrombectomy               | 313 (19.9)                             | 1,305 (34.5)                           | 44 (22.7)                    | <0.001 |
| ASA                                                   | 16 (1.0)                               | 84 (2.2)                               | 5 (2.6)                      | 0.010  |
| Clopidogrel                                           | 2 (0.1)                                | 11 (0.3)                               | 1 (0.5)                      | 0.420  |
| Ticagrelor                                            | 0 (0)                                  | 16 (0.4)                               | 1 (0.5)                      | 0.034  |
| Tirofiban                                             | 18 (1.1)                               | 84 (2.2)                               | 8 (4.1)                      | 0.003  |
| Abciximab                                             | 12 (0.8)                               | 0 (0)                                  | 0 (0)                        | 1.000  |
| Heparin                                               | 218 (13.9)                             | 912 (24.1)                             | 24 (12.4)                    | <0.001 |
| rtPA                                                  | 43 (2.7)                               | 78 (2.1)                               | 6 (3.1)                      | 0.239  |
| Acute treatment ipsilateral ICA (stenting and/or PTA) | 167 (10.6)                             | 526 (13.9)                             | 25 (12.9)                    | 0.015  |
| No. of passages                                       | 2.0±1.6                                | 2.2±1.9                                | 2.5±1.9                      | <0.001 |
| <b>Periprocedural complications</b>                   |                                        |                                        |                              |        |
| Device malfunction                                    | 230 (14.6)                             | 802 (21.2)                             | 57 (29.4)                    | <0.001 |
| Dissection, perforation                               | 8 (0.5)                                | 18 (0.5)                               | 2 (1.0)                      | 0.557  |
| Clot migration, embolization                          | 41 (2.6)                               | 105 (2.8)                              | 11 (5.7)                     | 0.049  |
| ICH                                                   | 54 (3.4)                               | 154 (4.1)                              | 9 (4.6)                      | 0.480  |
| ICH                                                   | 29 (1.8)                               | 111 (2.9)                              | 12 (6.2)                     | <0.001 |

**Supplementary Table 1.** Continued

| Characteristic                              | Conscious sedation<br>(n=1,572, 27.1%) | General anesthesia<br>(n=3,786, 65.2%) | Conversion<br>(n=194, 3.3%)  | P      |
|---------------------------------------------|----------------------------------------|----------------------------------------|------------------------------|--------|
| Vasospasm                                   | 56 (3.6)                               | 344 (9.1)                              | 20 (10.3)                    | <0.001 |
| Other                                       | 108 (6.9)                              | 220 (5.8)                              | 22 (11.3)                    | 0.005  |
| Successful reperfusion mTICI 2b/3           | 1,303 (82.9)                           | 3,192 (84.3)                           | 162 (83.5)                   | 0.117  |
| 24-hr Follow-up                             |                                        |                                        |                              |        |
| mRS                                         | 4 (3–5)<br>(missing in n=86)           | 5 (3–5)<br>(missing in n=411)          | 5 (4–5)<br>(missing in n=29) | <0.001 |
| NIHSS                                       | 8 (4–16)                               | 11 (5–19)                              | 14 (5–22)                    | <0.001 |
| Complications                               | 682 (43.4)                             | 1,765 (46.6)                           | 103 (53.1)                   | 0.012  |
| Malignant middle cerebral artery infarction | 67 (4.3)                               | 278 (7.3)                              | 15 (7.7)                     | <0.001 |
| Recurrent stroke                            | 56 (3.6)                               | 203 (5.4)                              | 4 (2.1)                      | 0.004  |
| ICH                                         | 184 (11.7)                             | 669 (15.0)                             | 44 (22.7)                    | <0.001 |
| Groin haematoma                             | 34 (2.2)                               | 55 (1.5)                               | 7 (3.6)                      | 0.384  |
| Groin aneurysma                             | 14 (0.9)                               | 26 (0.7)                               | 1 (0.5)                      | 0.381  |
| Other complications                         | 412 (26.2)                             | 1,055 (27.9)                           | 61 (31.4)                    | 0.104  |
| Hospital stay                               | 9.5±7.4                                | 11.3±9.7                               | 11.2±8.3                     | <0.001 |
| Discharge                                   |                                        |                                        |                              |        |
| mRS                                         | 4 (2–5)<br>(missing in n=17)           | 4 (2–5)<br>(missing in n=274)          | 4 (2–5)<br>(missing in n=9)  | <0.001 |
| NIHSS                                       | 4 (1–11)                               | 5 (2–12)                               | 6 (2–13)                     | 0.024  |
| Mortality (mRS 6)                           | 180 (11.5)                             | 625 (16.5)                             | 22 (12.0)                    | <0.001 |

Values are presented as mean±standard deviation, number (%), or median (interquartile range).

GSR, German Stroke Registry; pmRS, pre-stroke modified Rankin Scale; NIHSS, National Institutes of Health Stroke Scale; BP, blood pressure; OAC, oral anti-coagulation; ASPECTS, Alberta Stroke Program Early CT Score; IVT, intravenous thrombolysis; ASA, acetylsalicylic acid; rtPA, recombinant tissue plasminogen activator; ICA, internal carotid artery; PTA, percutaneous transluminal angioplasty; ICH, intracerebral hemorrhage; mTICI, modified thrombolysis in cerebral infarction; mRS, modified Rankin Scale.
